# Supplementary material for: Origin of photoluminescence of water-soluble CuInS2 quantum dots prepared via a hydrothermal method
Source: Royal Society of Chemistry journal article supplement (doi:10.1039/d1ra05761h), 2021-01-01
Supplement: d1ra05761h1.pdf [file d1ra05761h1.pdf]

## **Electronic supplementary information**

Origin of photoluminescence of water-soluble CuInS<sub>2</sub> quantum dots prepared via a  
hydrothermal method

Kazutaka Iida, Yota Uehigashi, and DaeGwi Kim\*

Department of Applied Physics, Osaka City University, Osaka 558-8585, Japan

### **Table of Contents**

- 1. Absorption and PL spectra, and PL decay profiles of the colloidal solution and film samples of CIS QDs at room temperature.**
- 2. Excitation intensity dependence of the PL spectra of CIS QDs at 15 K.**

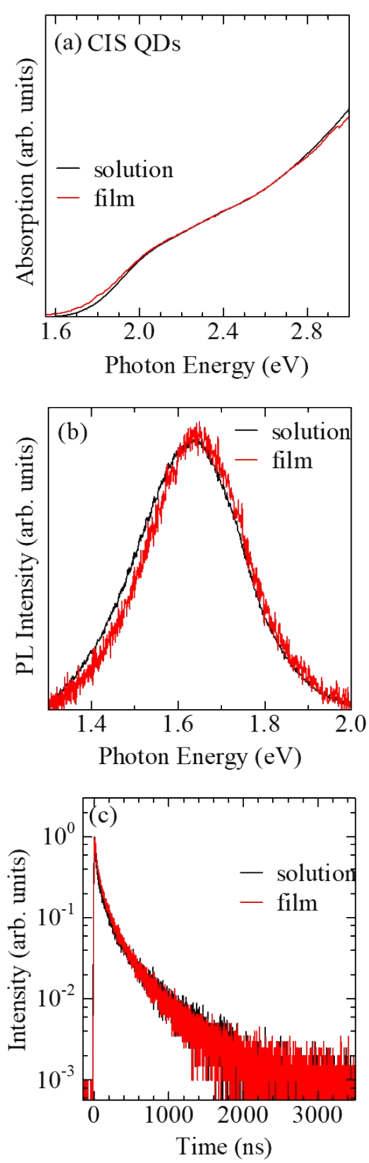

Fig. S1. (a) Absorption, (b) PL spectra, and (c) PL decay profiles of the colloidal solution and film samples of CIS QDs at room temperature.

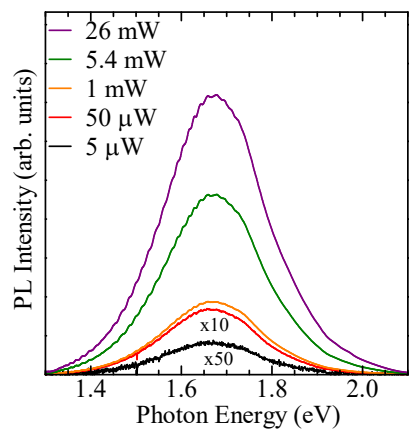

Fig. S2. Excitation intensity dependence of the PL spectra of CIS QDs at 15 K.
